# Supplementary material
Source: PubMed Central journal article supplement (PMC6439954)
Supplement: jamaneurol-76-144-s001.pdf [file jamaneurol-76-144-s001.pdf]

## Supplementary Online Content

Fralick M, Sy E, Hassan A, Burke MJ, Mostofsky E, Karsies T. Association of concussion with the risk of suicide: a systematic review and meta-analysis. *JAMA Neurol*. Published online November 12, 2018. doi: 0.1001/jamaneurol.2018.3487

**eMethods.** Systematic Review Search strategy, Analysis – further details, and PROSPERO Details

**eFigure.** Funnel plot assessment for risk of publication bias using effect estimates from all included studies.

**eTable 1.** Results of the critical appraisal using the Newcastle-Ottawa Scale

**eTable 2.** Additional characteristics of included studies

**eReferences.**

This supplementary material has been provided by the authors to give readers additional information about their work.

**eMethods.** Systematic Review Search strategy, Analysis – further details, and PROSPERO Details.

### **Systematic Review Search strategy**

All search terms were identified following consultation with a librarian with expertise in systematic review and with clinicians who are content experts in the field. The databases below were searched until May 1, 2017.

#### **PubMed (MEDLINE)**

1. Suicide [MeSH]
2. suicid\* [tiab]
3. self kill\* [tiab]
4. Brain concussion [MeSH]
5. Brain injuries [MeSH]
6. concuss\* [tiab]
7. brain injur\* [tiab]
8. brain traum\* [tiab]
9. cortical contusion\* [tiab]
10. commotio cerebri [tiab]

#### PubMed Search

- Search (#1 or #2 or #3) AND search (#4 or #5 or #6 or #7 or #8 or #9 or #10)
- Filters: Humans; English; French; Italian

#### **EMBASE**

1. Suicid\*:ab,ti OR 'suicidal behavior'/exp OR (self NEXT/1 kill\*):ab,ti
2. 'Brain injury'/exp OR concus\*:ab,ti OR (brain NEXT/1 traum\*):ab,ti OR (brain NEXT/1 injur\*):ab,ti

#### EMBASE Search

- 1&2
- Filters: Humans; English; French; Italian

#### **PsycINFO**

[DE "head injuries" OR TI concuss\* OR AB concuss\*] AND [(DE "suicide" OR DE "Assisted Suicide" OR DE "Attempted suicide" OR DE "suicidal ideation" OR TI suicide\* OR AB suicide\*)]

Limiters: English, French, Italian, Human

## **PILOTS**

SU.EXACT("completed suicide") OR (SU.EXACT("deaths by suicide") OR (Self-kill\*) OR (Suicid\* OR Su.exact("deaths by suicide"))) AND concuss\*

### **Google Scholar**

1. With all of the words: concussion, suicide
  - a. Titles and abstracts reviewed for the first 10 pages of results
  - b. 3 full manuscripts reviewed, 0 articles included
2. With all of the words: suicide & With the exact phrase: "traumatic brain injury"
  - a. Titles and abstracts reviewed for the first 10 pages of results
  - b. 3 full manuscripts reviewed, 1 article included

### **Annual Academy of Neurology Conference**

1. Annual Academy of Neurology (2012, 2013, 2014, 2015, 2016)
  - a. Search words: concussion, suicide, traumatic brain injury
  - b. We did not identify any additional relevant studies

## **Analysis – Further Details**

### *Reporting of suicide attempt versus ideation*

For the study by Bryant et al., they defined “suicidality” using a score which include prior ideation as well as attempt. Since it included both ideation and possibly attempt, we provide the point-estimate in our table of suicidal ideation.

### *Number of concussion/mild TBI*

When the number of concussion or mild TBI were not provided in the manuscript, we contacted the paper’s corresponding author. In the case of the study by Richard et al., the number of mild TBI could not be determined in the manuscript. Dr. Richard verified that the number of mild TBI was 5,314.

### *Relative risk calculation*

For the study by Schneider et al., there were 0 suicide attempts in the non-TBI group, so we used a continuity correction of 0.5 added to each cell and calculated an unadjusted risk ratio. Ilie et al. reported separate estimates for recent TBI and past TBI, so we calculated a combined estimate using a random-effects model. They also provided odds ratios for patients with hazardous drinking, but we did not include these in our combined estimate. Vanderploeg et al. reported separate estimates for the risk of suicidal ideation among deployed and non-deployed military personnel, so we calculated a combined estimate using a random-effects model.

## **PROSPERO Details**

Our study was registered on PROSPERO (CRD: 42016049388) *a priori*. We intended to perform a secondary analysis assessing the risk of suicide attempt stratified by the number of prior concussions. We did not pursue this analysis because too few studies reported number of concussion. More than >90% of the studies presented a history of concussion as a binary variable (yes/no). In addition, we planned to perform other subgroup analyses (e.g., stratified by presence of comorbid psychiatric disease, restricted by method of concussion diagnosis), but these were not possible due to a lack of statistical power and limited available data (e.g., few studies provided details on comorbid psychiatric disease).

**eFigure. Funnel plot assessment for risk of publication bias using effect estimates from all included studies.**

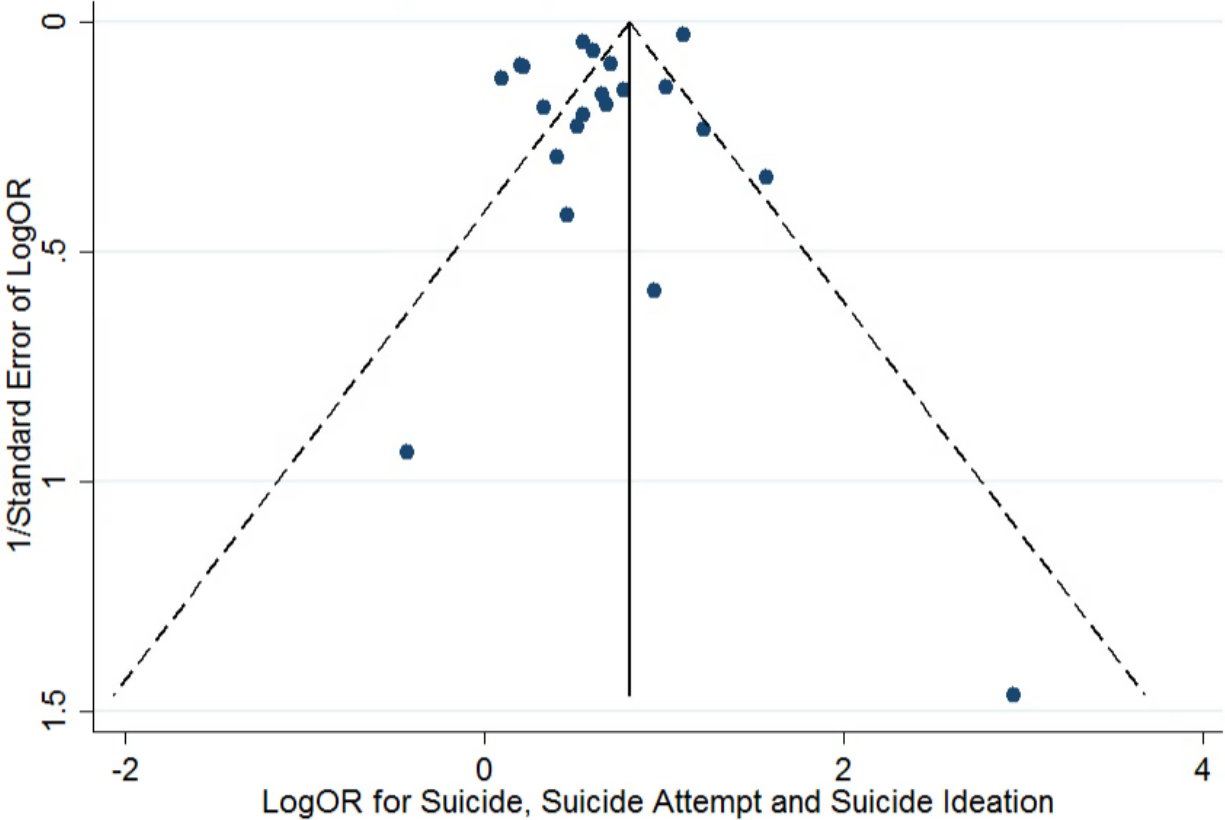

Dotted lines represent pseudo 95% CI.

**eTable 1. Results of the critical appraisal using the Newcastle-Ottawa Scale**

| Study        | Study Design | Selection                 |                       | Comparability         |                        | Exposure                    |                           | Total Score |                                    |                   |
|--------------|--------------|---------------------------|-----------------------|-----------------------|------------------------|-----------------------------|---------------------------|-------------|------------------------------------|-------------------|
|              |              | Case Definition Adequate? | Cases Representative? | Selection of Controls | Definition of Controls | Based on Design or Analysis | Ascertainment of Exposure |             | Same method for Cases and Controls | Non-response Rate |
| Barnes, 2012 | Case Control | -                         | +                     | -                     | +                      | +                           | -                         | +           | +                                  | <b>5</b>          |
| Skopp, 2012  | Case Control | +                         | +                     | +                     | +                      | ++                          | -                         | +           | -                                  | <b>7</b>          |

  

| Study           | Study Design         | Selection                      |                                 | Comparability             |                                     | Outcome                     |                       | Total Score |                     |                    |
|-----------------|----------------------|--------------------------------|---------------------------------|---------------------------|-------------------------------------|-----------------------------|-----------------------|-------------|---------------------|--------------------|
|                 |                      | Exposed Cohort Representative? | Selection of Non-Exposed Cohort | Ascertainment of Exposure | Outcome not present at study start? | Based on Design or Analysis | Assessment of Outcome |             | Timing of Follow-up | Adequate Follow-up |
| Brenner, 2011   | Retrospective Cohort | +                              | +                               | -                         | +                                   | ++                          | +                     | -           | -                   | <b>6</b>           |
| Bryan, 2013     | Retrospective Cohort | -                              | +                               | +                         | -                                   | ++                          | -                     | -           | -                   | <b>4</b>           |
| Bryant, 2016    | Prospective Cohort   | +                              | +                               | +                         | -                                   | ++                          | +                     | +           | -                   | <b>7</b>           |
| Fazel, 2014     | Retrospective Cohort | +                              | +                               | -                         | +                                   | ++                          | +                     | +           | -                   | <b>7</b>           |
| Fralick, 2016   | Retrospective Cohort | +                              | +                               | -                         | +                                   | -                           | +                     | +           | +                   | <b>6</b>           |
| Oquendo, 2004   | Retrospective Cohort | -                              | +                               | -                         | -                                   | -                           | -                     | +           | +                   | <b>3</b>           |
| Richard, 2015   | Retrospective Cohort | +                              | +                               | -                         | +                                   | +                           | +                     | +           | -                   | <b>6</b>           |
| Schneider, 2016 | Retrospective Cohort | -                              | +                               | -                         | -                                   | -                           | +                     | -           | -                   | <b>2</b>           |
| Stein, 2015     | Prospective Cohort   | +                              | +                               | -                         | +                                   | +                           | -                     | +           | +                   | <b>6</b>           |
| Teasdale, 2001  | Retrospective Cohort | +                              | -                               | -                         | +                                   | -                           | +                     | +           | -                   | <b>4</b>           |

  

| Study                  | Study Design    | Selection              |                      | Comparability   |                           | Outcome                     |                       | Total Score |                  |
|------------------------|-----------------|------------------------|----------------------|-----------------|---------------------------|-----------------------------|-----------------------|-------------|------------------|
|                        |                 | Representative Sample? | Sample Size Adequate | Non-Respondents | Ascertainment of Exposure | Based on Design or Analysis | Assessment of Outcome |             | Statistical Test |
| Ilie, 2014             | Cross-Sectional | +                      | +                    | +               | -                         | +                           | +                     | +           | <b>6</b>         |
| Vanderploeg, 2015      | Cross-Sectional | +                      | +                    | -               | -                         | +                           | +                     | +           | <b>5</b>         |
| Mackelprang, 2014      | Cross-Sectional | +                      | +                    | -               | -                         | +                           | -                     | +           | <b>4</b>         |
| Ilie, 2016             | Cross-sectional | +                      | +                    | +               | +                         | ++                          | +                     | +           | <b>8</b>         |
| Topolovec-Vranic, 2017 | Cross-sectional | +                      | +                    | -               | -                         | +                           | ++                    | +           | <b>6</b>         |

**eTable 2. Additional characteristics of included studies**

| <b>A. Suicide</b> |                                                   |                                                                      |                                               |                                                                      |                                                                                                                                                           |
|-------------------|---------------------------------------------------|----------------------------------------------------------------------|-----------------------------------------------|----------------------------------------------------------------------|-----------------------------------------------------------------------------------------------------------------------------------------------------------|
| <b>Study</b>      | <b>Suicides among individuals with concussion</b> | <b>Individuals with concussion or mild TBI (% male, average age)</b> | <b>Suicides among individuals without TBI</b> | <b>Individuals without concussion or any traumatic brain injury</b>  | <b>Approximating absolute risk of suicide following concussion</b>                                                                                        |
| Teasdale, 2001    | N=750                                             | N=126,114 (60%, 25)                                                  | Data not available                            | Data not available                                                   | 0.59% of patients with concussion died from suicide, median time from concussion to suicide was 3.6 years. The maximum duration of follow-up was 15 years |
| Brenner, 2011     | N=33                                              | N=12,159 (90%, 58) <sup>A</sup>                                      | N = 11,279                                    | N = 7,800,846 (a random sample of 389053 were used for the analysis) | 0.27% of patients died from suicide, median duration of follow-up unknown                                                                                 |
| Skopp, 2012       | N=97                                              | N=420 (Cases N=97, Controls = 323) (96%, 98% < 40) <sup>B</sup>      | Not applicable                                | N=8,221 (Cases N=1,635, Controls N=6,586)                            | Case-control study and thus absolute risk could not be accurately calculated.                                                                             |
| Fazel, 2014       | N=1,664                                           | N=333,118 (69%, 19) <sup>C</sup>                                     | N = 5,962                                     | N = 3,331,180                                                        | 0.50% of patients with concussion died from suicide over a median follow-up of 4-years                                                                    |
| Richard, 2015     | N=31 <sup>D</sup>                                 | N=5,314 (57%, 8)                                                     | N=390                                         | N=113,582                                                            | 0.49% of patients with concussion died from suicide over a median follow-up of 12.3-years.                                                                |
| Fralick, 2016     | N=667                                             | N=235,110 (52%, 41)                                                  | N= 3,934                                      | N=2,397,192                                                          | 0.28% of patients with concussion died from suicide over a median follow-up of 9.3 years                                                                  |

Legend: TBI = traumatic brain injury. Age is in years.



<sup>A</sup> Numbers reflect patients included in the study including those without concussion.

<sup>B</sup> All patients who died by suicide, average age was not provided.

<sup>C</sup> All TBI patients. The age is for age at time of TBI.

<sup>D</sup> There were 26 concussions, but the authors included 5 other TBI and that is the number (i.e., 31) they used to calculate their effect size. For our estimate of approximating the absolute rate of suicide following concussions we used the number of concussions only.

## **eReferences.**

Richard YF, Swaine BR, Sylvestre MP, Lesage A, Zhang X, Feldman DE. The Association between Traumatic Brain Injury and Suicide: Are Kids at Risk? *Am. J. Epidemiol* 2015; 182, 177–184.

Ilie G, Mann RE, Boak A, et al. Cross-sectional examination of the association of co-occurring alcohol misuse and traumatic brain injury on mental health and conduct problems in adolescents in Ontario, Canada. *BMJ Open* 2016;6: e011824.

Bryant RA, O'Donnell ML, Forbes D, McFarlane AC, Silove D, Creamer M. The Course of Suicide Risk Following Traumatic Injury. *J. Clin. Psychiatry* 2016;77:648–653.

Stein MB, Kessler RC, Heeringa SG, et al. Prospective longitudinal evaluation of the effect of deployment-acquired traumatic brain injury on posttraumatic stress and related disorders: results from the army study to assess risk and resilience in service members (Army STARRS). *Am J Psychiatry* 2015; 172:1101–1111.

Vanderploeg RD, Nazem Sarra, Brenner LA, Belanger HG, Donnell AJ, Scott SG. Suicidal ideation among Florida National Guard members: combat deployment and non-deployment risk and protective factors. *Archives of Suicide Research* 2015, 19:4, 453-471.

Fazel S, Wolf A, Pillas D, Lichtenstein P, Långström N. Suicide, fatal injuries, and other causes of premature mortality in patients with traumatic brain injury: a 41-year Swedish population study. *JAMA Psychiatry* 2014; 71(3), 326–33.

Teasdale TW, Engberg AW. Suicide after traumatic brain injury: a population study. *J Neurol Neurosurg Psychiatry* 2001;71:436–440.

Brenner LS, Ignacio RV, Blow FC. Suicide and traumatic brain injury among individuals seeking Veterans Health Administration services. *J. Head Trauma Rehabil* 2011;26:257–264.

Skopp NA, Trofimovich L, Grimes J, Oetjen-Gerdes L, Gahm GA. Relations between suicide and traumatic brain injury, psychiatric diagnoses, and relationship problems, active component, u.s. armed forces, 2001-2009. *MSMR* 2012; 19: 7 – 11.
